# Supplementary material for: Radiation therapy induces immunosenescence mediated by p90RSK
Source: PubMed Central journal article supplement (PMC9680092; doi:10.3389/fcvm.2022.988713), 2022-11-07
Supplement: Data_Sheet_1.pdf [file Data_Sheet_1.pdf]

| Metal | Marker               |               |                     | Surface or Internal |
|-------|----------------------|---------------|---------------------|---------------------|
| 89Y   | CD45                 | DVS-Fluidigm  | 3089003B            | S                   |
| 111Cd | p16                  | Abcam         | ab54210 (100 uL)    | I                   |
| 112Cd | Trx                  | Proteintech   | 14999-1-AP (150 uL) | I                   |
| 114Cd | p-jak2               | Abcam         | ab219728            | I                   |
| 115In | CD57                 | BioLegend     | 322325              | S                   |
| 116Cd | TET2                 | Invitrogen    | MA5-38640           | I                   |
| 141Pr | phospho-P90RSK(S380) | ABclonal      | AP0562              | I                   |
| 142Nd | Caspase 3, cleaved   | DVS-Fluidigm  | 3142004A            | I                   |
| 146Nd | CD8a                 | BioLegend     | 301002              | S                   |
| 147Sm | TOP2b                | R&D           | MAB6348 (100 ug)    | I                   |
| 148Nd | CD27                 | BioLegend     | 124202              | S                   |
| 149Sm | p53                  | BD            | 554294              | I                   |
| 150Nd | CD11c                | BioLegend     | 337221              | S                   |
| 151Eu | CD123                | BD            | 554527              | S                   |
| 152Sm | jak2                 | US Biological | 37177               | I                   |
| 153Eu | CD4                  | BioLegend     | 357402              | S                   |
| 154Sm | T-bet                | BioLegend     | 644825              | S                   |
| 155Gd | CD25                 | BD            | 555430              | S                   |
| 156Gd | TIM-3                | BioLegend     | 345002              | S                   |
| 158Gd | CD33                 | DVS-Fluidigm  | 3158001B            | S                   |
| 159Tb | P90RSK               | StressMarq    | SPC-147F            | I                   |
| 160Gd | CD14                 | BioLegend     | 301802              | S                   |
| 162Dy | CD56                 | BD            | 559043              | S                   |
| 163Dy | CD45RA               | BioLegend     | 304102              | S                   |
| 164Dy | Tyro3                | Novus         | NBP1-28635 (0.1 mL) | I                   |
| 165Ho | CD19                 | DVS-Fluidigm  | 3165025B            | S                   |
| 166Er | CD41                 | BioLegend     | 303702              | S                   |
| 167Er | CD38                 | BioLegend     | 303502              | S                   |
| 168Er | Ki67                 | BD            | 556003              | I                   |
| 169Tm | CD279, PD-1          | Miltenyi      | 130-096-168         | S                   |
| 170Er | DNMT3A               | Novus         | NB120-13888 (0.1mg) | I                   |
| 171Yb | CD68                 | DVS-Fluidigm  | 3171011B            | I                   |
| 173Yb | CD11b                | BioLegend     | 301302              | S                   |
| 174Yb | HLA-DR 174Yb (MDA)   | BioLegend     | 307602              | S                   |
| 175Lu | CD3                  | BioLegend     | 300443              | S                   |
| 176Yb | CD127, IL-7Ra        | DVS-Fluidigm  | 3176004B            | S                   |
| 209Bi | CD16                 | DVS-Fluidigm  | 3209002B            | S                   |
| 191Ir | Ir DNA-Intercalator  | DVS-Fluidigm  | 201192A             | nucleus             |
| 193Ir | Ir DNA-Intercalator  | DVS-Fluidigm  | 201192A             | nucleus             |
| 103Rh | Rh DNA-intercalator  | DVS-Fluidigm  | 201103A             | Viable cells        |

**Table S1**

|                                    | n  | Mean (SD)     |
|------------------------------------|----|---------------|
| Sex                                |    |               |
| Male                               | 16 | 100%          |
| Female                             | 0  | 0%            |
| Diagnosis                          |    |               |
| Esophagus cancer                   | 14 | 87.50%        |
| SCLC                               | 2  | 14.30%        |
| Age                                | 16 | 65.00 (8.48)  |
| RT modality                        |    |               |
| Proton                             | 3  | 18.8%         |
| VMAT                               | 11 | 68.8%         |
| 3-D                                | 1  | 6.3%          |
| IMRT                               | 1  | 6.3%          |
| RT total dose                      | 16 | 53.20 (6.30)  |
| RT fraction dose                   | 16 | 1.88 (0.20)   |
| RT fraction                        | 16 | 28.25 (0.68)  |
| Neutrophils number (K/ $\mu$ l)    |    |               |
| Pre-RT                             | 16 | 5.13 (1.92)   |
| End-RT                             | 16 | 3.78 (1.73)*  |
| Lymphocytes number (K/ $\mu$ l)    |    |               |
| Pre-RT                             | 16 | 1.76 (0.48)   |
| End-RT                             | 16 | 0.32 (0.13)** |
| Monocytes (K/ $\mu$ l)             |    |               |
| Pre-RT                             | 16 | 0.72 (0.20)   |
| End-RT                             | 16 | 0.67 (0.32)   |
| Eosinophils (K/ $\mu$ l)           |    |               |
| Pre-RT                             | 16 | 0.19 (0.11)   |
| End-RT                             | 16 | 0.12 (0.13)   |
| Basophils (K/ $\mu$ l)             |    |               |
| Pre-RT                             | 16 | 0.05 (0.02)   |
| End-RT                             | 16 | 0.03 (0.02)   |
| Risk factor of CVD                 |    |               |
| Hypertension                       | 9  | 56.3%         |
| Hyperlipidemia                     | 10 | 62.5%         |
| Diabetes                           | 5  | 31.3%         |
| Obesity (BMI>30kg/m <sup>2</sup> ) | 5  | 31.3%         |
| Past history of CVD                | 6  | 37.5%         |

**Table S2**

| Compartment | Cell subset                   | Description                                         |
|-------------|-------------------------------|-----------------------------------------------------|
| T cell      | NKT cell                      | CD3+CD19-CD33-CD41-CD56+                            |
| T cell      | CD8+T cell (Naïve)            | CD3+CD19-CD33-CD41-CD56-, CD4-CD8a+, CD45RA+, CD27+ |
| T cell      | CD8+ T cell (EMRA)            | CD3+CD19-CD33-CD41-CD56-, CD4-CD8a+, CD45RA+, CD27- |
| T cell      | CD8+ T cell (Effector Memory) | CD3+CD19-CD33-CD41-CD56-, CD4-CD8a+, CD45RA-, CD27- |
| T cell      | CD8+ T cell (Central Memory)  | CD3+CD19-CD33-CD41-CD56-, CD4-CD8a+, CD45RA-, CD27+ |
| T cell      | CD4+T cell (Naïve)            | CD3+CD19-CD33-CD41-CD56-, CD4+CD8a-, CD45RA+, CD27+ |
| T cell      | CD4+T cell (EMRA)             | CD3+CD19-CD33-CD41-CD56-, CD4+CD8a-, CD45RA+, CD27- |
| T cell      | CD4+T cell (Effector Memory)  | CD3+CD19-CD33-CD41-CD56-, CD4+CD8a-, CD45RA-, CD27- |
| T cell      | CD4+T cell (Central Memory)   | CD3+CD19-CD33-CD41-CD56-, CD4+CD8a-, CD45RA-, CD27+ |
| T cell      | CD4+CD8+ T cell               | CD3+CD19-CD33-CD41-CD56-, CD4+CD8a+                 |
| T cell      | CD4-CD8- T cell               | CD3+CD19-CD33-CD41-CD56-, CD4-CD8a-                 |
| Other       | CM- HLADR+                    | CD3-CD19-CD33-CD41-CD56-, CD123- HLA DR+            |
| Other       | CD41+                         | CD3-CD19-CD33-CD41+CD56-                            |
| NK cell     | NK Cell (CD56+ CD16+)         | CD3-CD19-CD33-CD41-CD56+, CD16+                     |
| NK cell     | NK Cell (CD56+ CD16-)         | CD3-CD19-CD33-CD41-CD56+, CD16-                     |
| Myeloid     | Monocyte (CD14+ CD16+)        | CD3-CD19-CD33+CD41-, CD14+, CD16+                   |
| Myeloid     | Monocyte (CD14+ CD16-)        | CD3-CD19-CD33+CD41-, CD14+, CD16-                   |
| Myeloid     | Monocyte (CD14- CD16+)        | CD3-CD19-CD33+CD41-, CD14-, CD16+                   |
| Myeloid     | Dendritic Cell (Plasmacytoid) | CD3-CD19-CD33-CD41-CD56-, CD11c-CD123+HLA DR+       |
| Myeloid     | Dendritic Cell (Conventional) | CD3-CD19-CD33+CD41-, CD14-, CD16-                   |
| Granulocyte | Granulocyte (Basophil)        | CD3-CD19-CD33-CD41-CD56-, CD123+HLA DR-             |
| B cell      | B cell (Plasmablast)          | CD3-CD19+CD33-CD41-CD56-, CD27+ CD38+               |
| B cell      | B cell (Memory)               | CD3-CD19+CD33-CD41-CD56-, CD27+, CD38-              |
| B cell      | B cell (CD27-)                | CD3-CD19+CD33-CD41-CD56-, CD27-                     |

**Table S3**

Figure S1

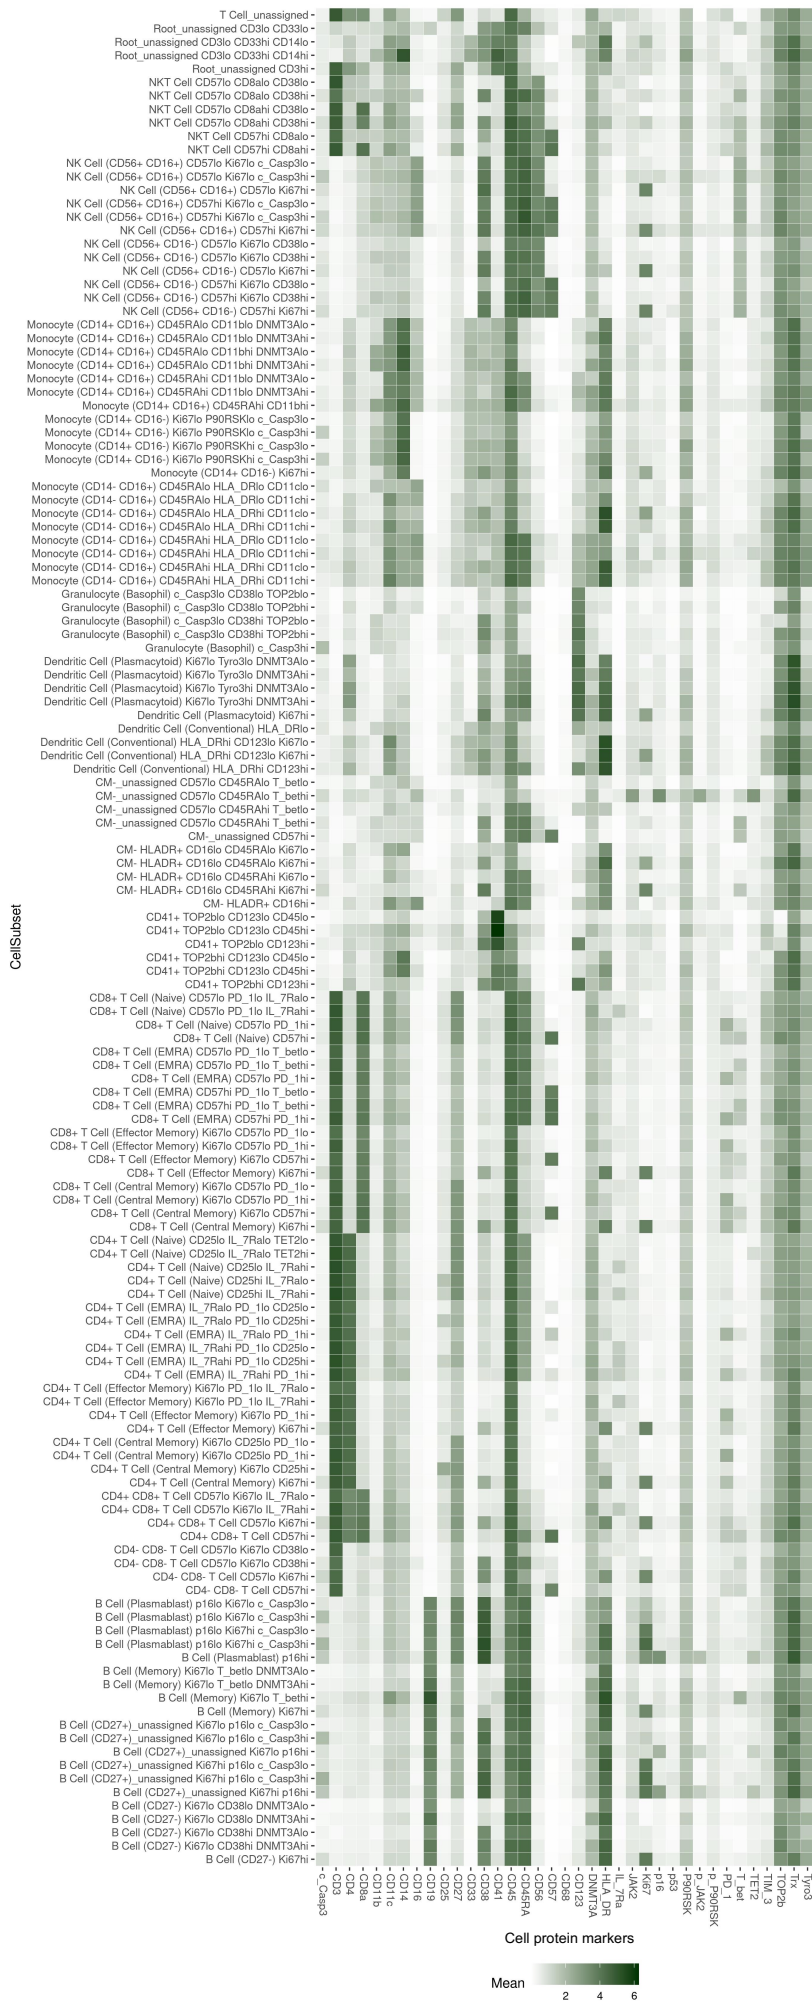

### A. CD8+ T cell

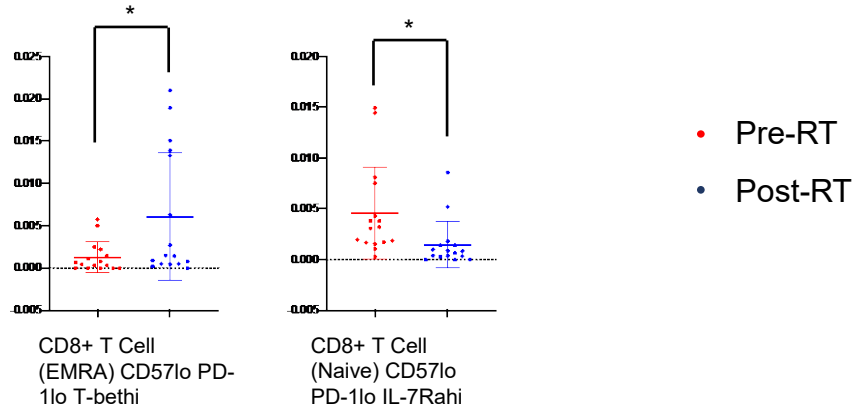

### B. CD4+ T cells

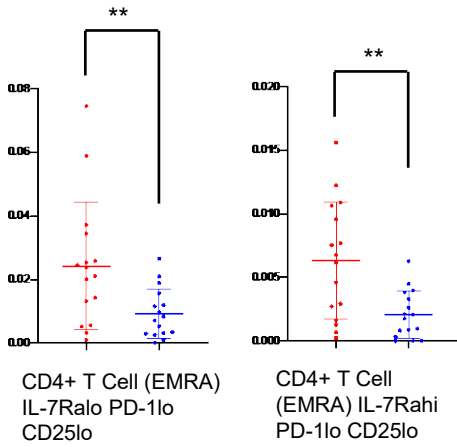

### C.

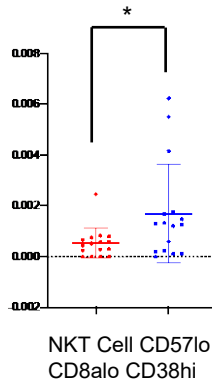

### D.

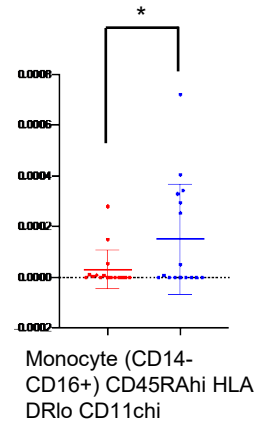

Figure S2

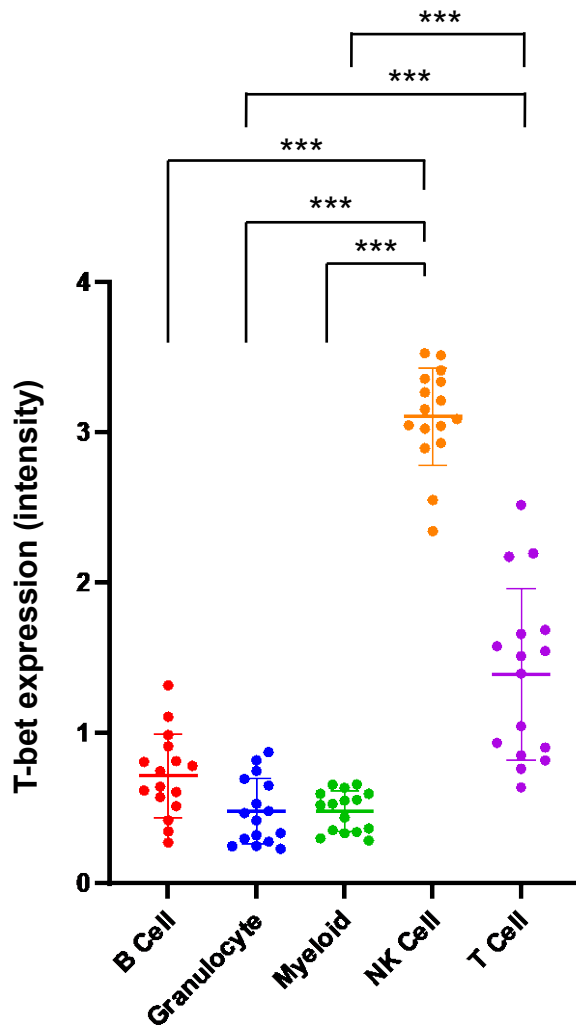

Figure S3
